# Supplementary material for: Working memory gating in obesity is moderated by striatal dopaminergic gene variants
Source: eLife. 2024 Oct 21;13:RP93369. doi: 10.7554/eLife.93369 (PMC11493406; doi:10.7554/eLife.93369)
Supplement: Supplementary file 1. — (A) Post hoc effects for the interaction of BMI, condition, and Taq1A. (B) Post hoc effects for the interaction of BMI, condition, and DARPP. (C) Full output final model 5 without extreme data point. (D) C957T-Taq1A interaction. (E) C957T-COMT interaction. (F) AminoAcidRatio-Taq1A interaction. (G) AminoAcidRatio-DARPP interaction. (H) Final outputs for the model comparisons for each model. [file elife-93369-supp1.xlsx]

## Sheet: Sheet1
Supplementary file 1A. Post hoc effects for the interaction of BMI, condition, and Taq1A								Supplementary file 1B. Post hoc effects for the interaction of BMI, condition, and DARPP								Supplementary file 1C. Full output final model 5 without extreme data point						Supplementary file 1D. C957T-Taq1A interaction							Supplementary file 1E. C957T-COMT interaction							Supplementary file 1F. AminoAcidRatio-Taq1A interaction							Supplementary file 1G. AminoAcidRatio-DARPP interaction
		Taq1A group	estimate	SE	lower 95-CI	higher 95-CI				DARPP group	estimate	SE	lower 95-CI	higher 95-CL				Chisq	Df	Pr(>Chisq)				Chisq	Df	Pr(>Chisq)					Chisq	Df	Pr(>Chisq)					Chisq	Df	Pr(>Chisq)					Chisq	Df	Pr(>Chisq)
ignore		A1-	-0.156	0.066	-0.285	-0.026		ignore		A/A	-0.181	0.061	-0.301	-0.062		(Intercept)		10.62	1	0.001		(Intercept)		276	1	< .001			(Intercept)		265	1	< .001			(Intercept)		18.5	1	< .001			(Intercept)		20	1	< .001
		A1+	-0.159	0.073	-0.302	-0.016				G-carrier	-0.0625	0.076	-0.211	0.086		AAratio		0.54	1	0.461		condition		26.9	3	< .001			condition		34.9	3	< .001			condition		2.81	3	0.422			condition		6.92	3	0.075
update		A1-	-0.012	0.072	-0.153	0.129		update		A/A	-0.044	0.066	-0.174	0.086		zBMI		0.8	1	0.37		C957T		0.078	1	0.78			C957T		0.797	1	0.372			AAratio		0.044	1	0.835			AAratio		0.001	1	0.972
		A1+	-0.339	0.076	-0.488	-0.191				G-carrier	-0.324	0.079	-0.478	-0.17		condition		2.98	3	0.394		Taq1A		0.007	1	0.932			COMT		2.56	2	0.278			Taq1A		0.294	1	0.588			DARPP		0.147	1	0.701
control long		A1-	-0.143	0.069	-0.279	-0.008		control long		A/A	-0.206	0.063	-0.329	-0.082		zIQ		4.88	1	0.027		zBMI		6.47	1	0.011			zBMI		2.62	1	0.106			zBMI		1.75	1	0.185			zBMI		1.06	1	0.303
		A1+	-0.321	0.074	-0.466	-0.175				G-carrier	-0.1689	0.078	-0.322	-0.016		zWM_conc		11.55	1	< .001		zIQ		27.8	1	< .001			zIQ		24.6	1	< .001			zIQ		11.1	1	< .001			zIQ		10.1	1	0.001
control short		A1-	-0.194	0.078	-0.347	-0.042		control short		A/A	-0.194	0.069	-0.331	-0.057		Gender		18.49	1	< .001		Gender		7.75	1	0.005			Gender		8.73	1	0.003			Gender		4.9	1	0.027			Gender		3.52	1	0.061
		A1+	-0.26	0.081	-0.421	-0.099				G-carrier	-0.213	0.086	-0.38	-0.045		AAratio:zBMI		0.28	1	0.597		zWM_tired		11.4	1	< .001			zWM_tired		10.4	1	0.001			zWM_tired		2.6	1	0.107			zWM_tired		4.38	1	0.036
Note: the non-significant effect was highlighted in bold.								Note: non-significant effects are highlighted in bold.								AAratio:condition		7.28	3	0.064		zWM_conc		30.9	1	< .001			zWM_conc		32.6	1	< .001			zWM_conc		22.1	1	< .001			zWM_conc		22.6	1	< .001
																BMI:condition		8.61	3	0.035		condition:C957T		3.64	3	0.303			condition:C957T		4.33	3	0.228			condition:AAratio		7.31	3	0.063			condition:AAratio		13.2	3	0.004
																AAratio:BMI:condition		10.34	3	0.016		condition:Taq1A		2.97	3	0.396			condition:COMT		2.91	6	0.82			condition:Taq1A		0.743	3	0.863			condition:DARPP		2.32	3	0.508
																N = 159						C957T:Taq1A		0.047	1	0.828			C957T:COMT		3.12	2	0.21			AAratio:Taq1A		0.42	1	0.517			AAratio:DARPP		0.292	1	0.589
																Marginal R2 / Conditional R2 = 0.068 / 0.170						condition:zBMI		1.21	3	0.751			condition:zBMI		1.67	3	0.644			condition:zBMI		6.95	3	0.074			condition:zBMI		16.6	3	< .001
																						C957T:zBMI		1.48	1	0.224			C957T:zBMI		0.113	1	0.736			AAratio:zBMI		0.403	1	0.525			AAratio:zBMI		0.273	1	0.601
																						Taq1A:zBMI		2.21	1	0.138			COMT:zBMI		1.37	2	0.504			Taq1A:zBMI		0.174	1	0.676			DARPP:zBMI		0.017	1	0.896
																						condition:C957T:Taq1A		2.69	3	0.442			condition:C957T:COMT		1.38	6	0.967			condition:AAratio:Taq1A		0.784	3	0.853			condition:AAratio:DARPP		2.22	3	0.528
																						condition:C957T:zBMI		0.848	3	0.838			condition:C957T:zBMI		1.45	3	0.694			condition:AAratio:zBMI		9.79	3	0.02			condition:AAratio:zBMI		17.2	3	< .001
																						condition:Taq1A:zBMI		1.06	3	0.786			condition:COMT:zBMI		15.2	6	0.019			condition:Taq1A:zBMI		1.93	3	0.588			condition:DARPP:zBMI		7.4	3	0.06
																						C957T:Taq1A:zBMI		0.596	1	0.44			C957T:COMT:zBMI		1.27	2	0.529			AAratio:Taq1A:zBMI		0.001	1	0.969			AAratio:DARPP:zBMI		0.003	1	0.955
																						condition:C957T:Taq1A:zBMI		1.8	3	0.615			condition:C957T:COMT:zBMI		14.4	6	0.026			condition:AAratio:Taq1A:zBMI		2.07	3	0.559			condition:AAratio:DARPP:zBMI		8.92	3	0.03
																						N = 318							N = 318							N = 160							N = 160
																						Marginal R2 / Conditional R2 = 0.074 / 0.172							Marginal R2 / Conditional R2 = 0.073 / 0.173							Marginal R2 / Conditional R2 = 0.077 / 0.172							Marginal R2 / Conditional R2 = 0.076 / 0.173
[truncated: 10 more columns]
